# Supplementary material for: Trans-Chalcone Attenuates Pain and Inflammation in Experimental Acute Gout Arthritis in Mice
Source: PubMed Central journal article supplement (PMC6176465; doi:10.3389/fphar.2018.01123), 2018-10-02
Supplement: Presentation_1.pdf [file Presentation_1.pdf]

## ***Trans*-Chalcone attenuates pain and inflammation in experimental acute gout arthritis in mice**

Larissa Staurengo-Ferrari<sup>1,f</sup>, Kenji W. Ruiz-Miyazawa<sup>1,f</sup>, Felipe A. Pinho-Ribeiro<sup>1</sup>, Victor Fattori<sup>1</sup>, Tiago H. Zaninelli<sup>1</sup>, Stephanie Badaro-Garcia<sup>1</sup>, Sergio M. Borghi<sup>1</sup>, Thacyana T. Carvalho<sup>1</sup>, Jose C. Alves-Filho<sup>2</sup>, Thiago M. Cunha<sup>2</sup>, Fernando Q. Cunha<sup>2</sup>, Rubia Casagrande<sup>3</sup>, and Waldiceu A. Verri, Jr.<sup>1,\*</sup>

<sup>1</sup>Departamento de Ciências Patológicas, Universidade Estadual de Londrina-UEL, Londrina, Paraná, PR, Brazil.

<sup>2</sup>Department of Pharmacology, Ribeirão Preto Medical School, University of São Paulo, Ribeirão Preto, São Paulo, SP, Brazil

<sup>3</sup>Departamento de Ciências Farmacêuticas, Universidade Estadual de Londrina-UEL, Londrina, Paraná, PR, Brazil.

<sup>f</sup>These authors contributed equally.

\*Correspondence:

Waldiceu A. Verri Jr

waldiceujr@yahoo.com.br; waverri@uel.br

**Running title:** *Trans*-chalcone attenuates gout arthritis

## SUPPLEMENTARY DATA

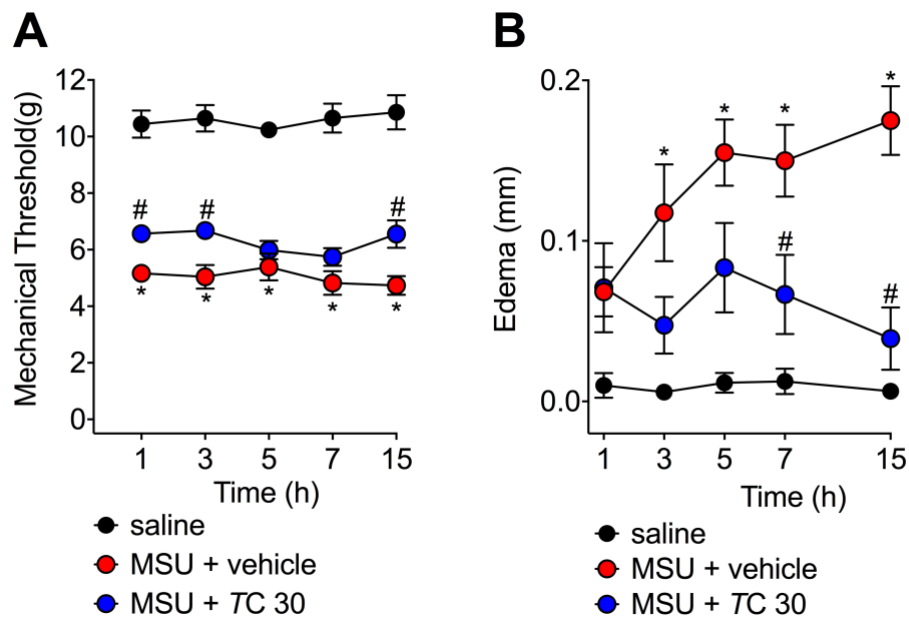

**Figure S1. Effect of trans-chalcone post-treatment in MSU-induced mechanical hyperalgesia and edema.** Mice were treated *Trans*-Chalcone (TC, 30 mg/kg, p.o., 100  $\mu$ l) or vehicle (Tween 80 20% plus saline) 30 minutes after MSU (100  $\mu$ g/10  $\mu$ l/knee) or saline stimulus in the femur-tibial joint of swiss mice. **(A)** Mechanical hyperalgesia and **(B)** edema were evaluated 1, 3, 5, 7, and 15h after MSU injection. Results are expressed as mean  $\pm$  SEM, data represent a total of 12 mice per group that were obtained in two independent experiment with 6 mice per experiment. (\* $p < 0.05$  vs. control group; # $p < 0.05$  vs. vehicle group, two-way ANOVA followed by Tukey's post-test).

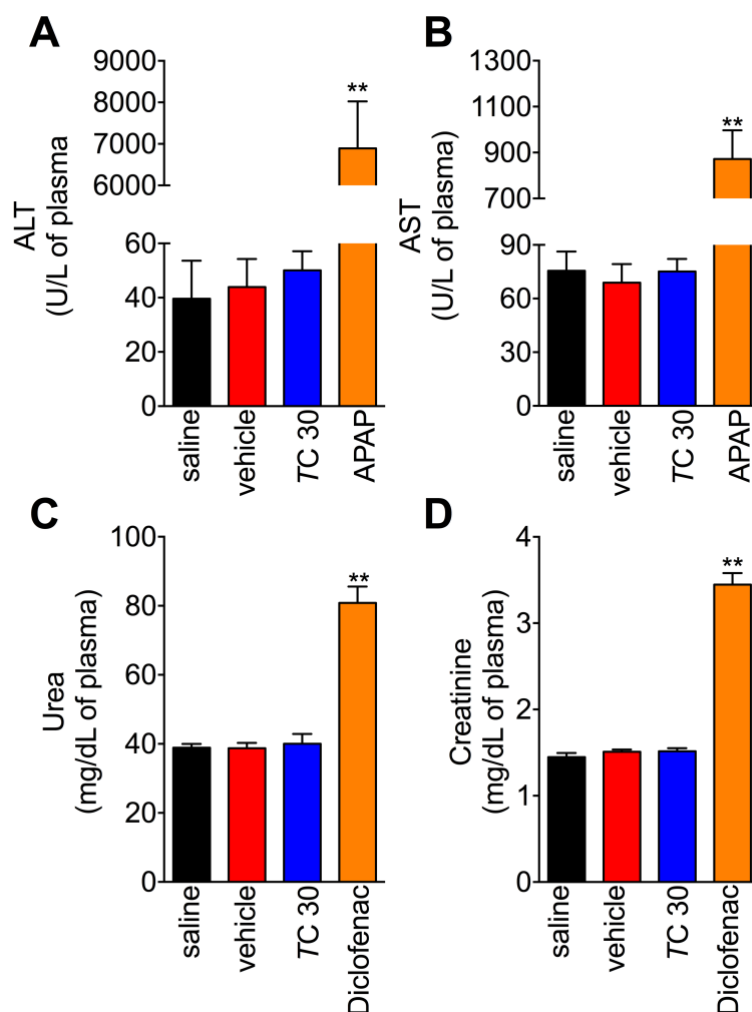

**Figure S2. *Trans*-chalcone does not induce kidney or liver injury.** Blood was collected 15.5h after treatment with *trans*-chalcone (TC, 30 mg/kg, p.o.) or vehicle (Tween 80 20% plus saline) to assess: (A) alanine transaminase (ALT), (B) aspartate aminotransferase (AST) levels in plasma samples. Acetaminophen stimulus (APAP, 650 mg/kg, p.o.) was used as a control drug for liver injury and samples were collected after 10h after stimulus. (C) Urea and (D) creatinine levels in plasma samples. Diclofenac stimulus (200 mg/kg, p.o.) was used as a control drug for kidney injury and samples were collected 24h after stimulus. Results are expressed as mean  $\pm$  SEM, data represent a total of 12 mice per group that were obtained in two independent experiment with 6 mice per experiment. (\*\* $p < 0.05$  vs. all groups, one ANOVA followed by Tukey's post-test).

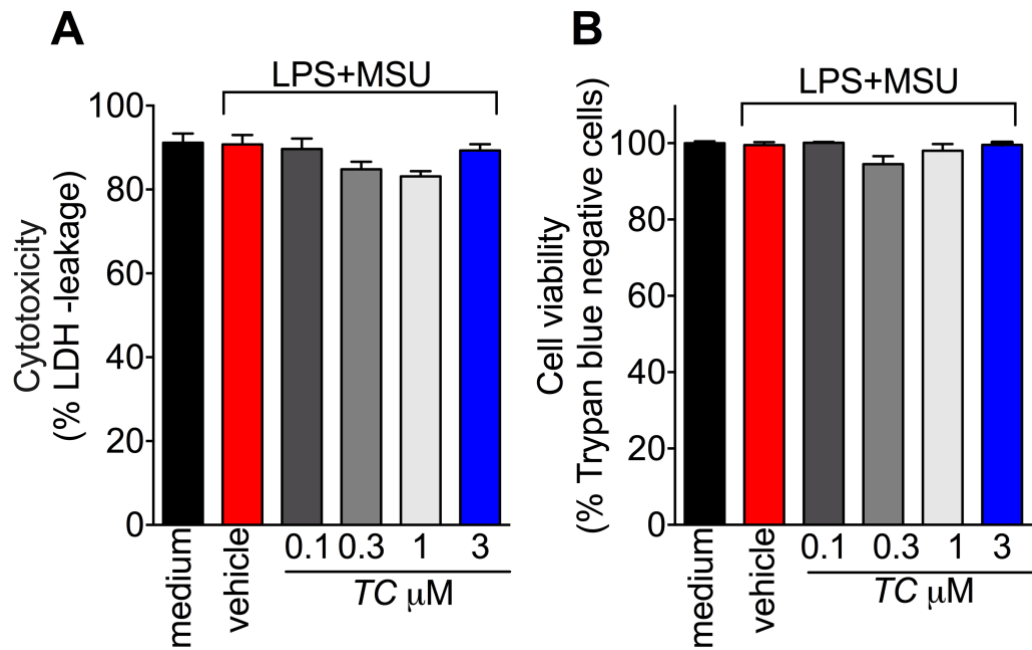

**Figure S3. *Trans*-chalcone does not induce cytotoxicity or alters cell viability.** BMDMs were pre-treated with 0.1-3  $\mu$ M before 500 ng/mL of LPS (*before* priming) and after 3h were secondarily stimulated with MSU (450 mg/ml, activation). (A) Supernatants were collected 5h after MSU stimulation in BMDMs cells to assess LDH levels and (B) Trypan Blue assay to determine cell viability. The results were expressed as % of LDH release or dead cells from total cells counted by comparing with the positive control (vehicle group).
